# Supplementary material
Source: HighWire-hosted journal article supplement (https://www.cancerbiomed.org/content/20/1/77)
Supplement: media-1 [file media-1.pdf]

# Supplementary materials

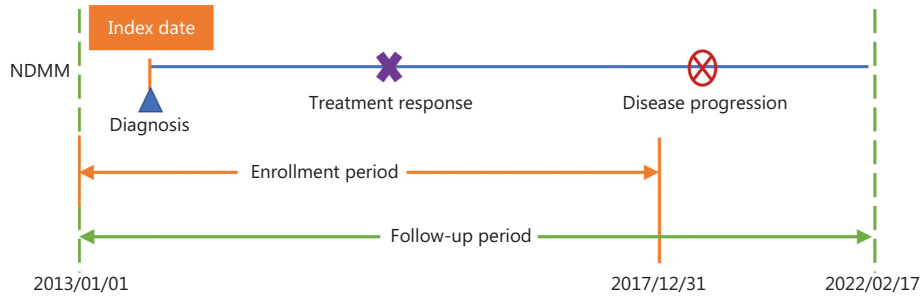

**Figure S1** Overview of the study design. NDMM, newly diagnosed multiple myeloma.

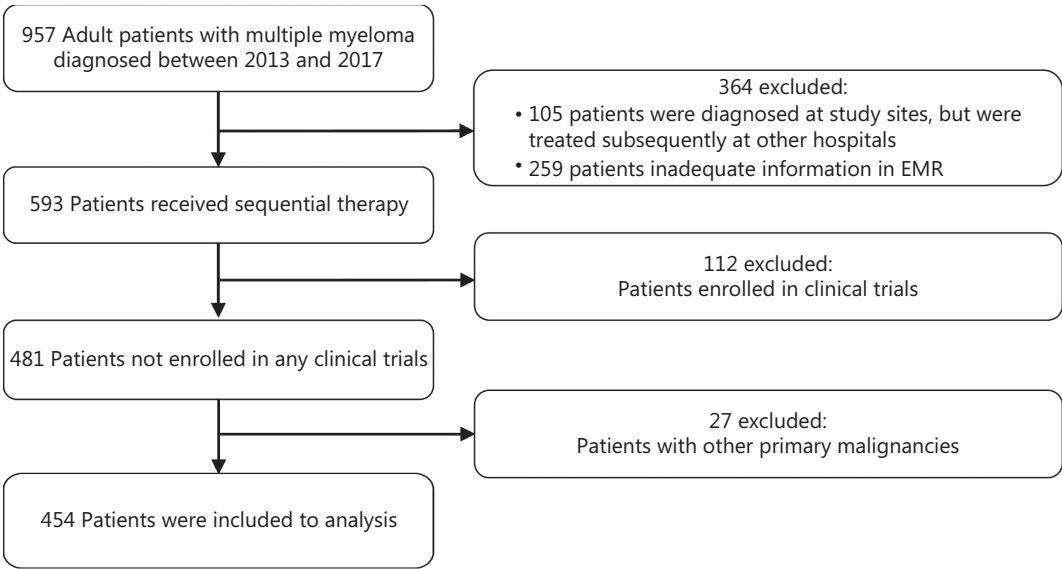

**Figure S2** Study population. EMR, electronic medical records.

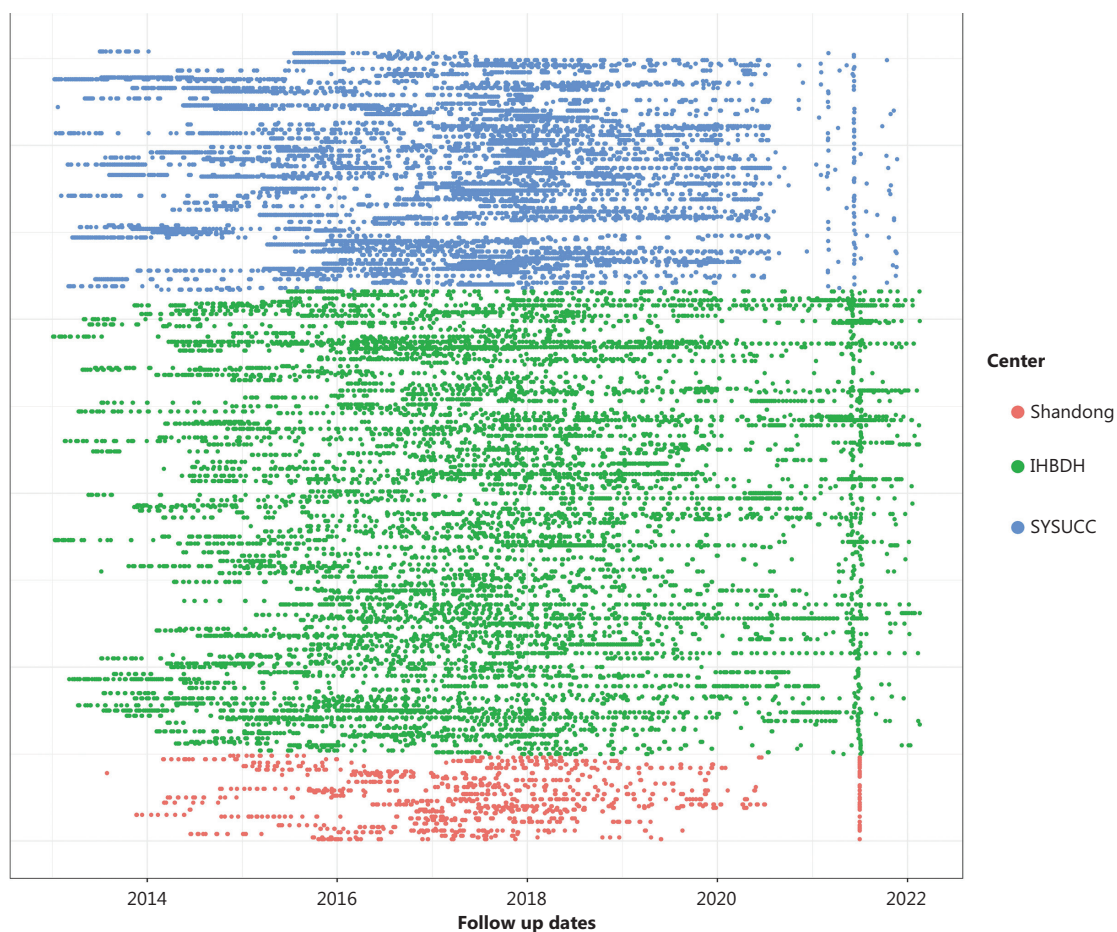

**Figure S3** Spaghetti plot of follow-up time for patients. IHBDH, Institute of Hematology and Blood Diseases Hospital; Shandong, Shandong Provincial Hospital; SYSUCC, Sun Yat-Sen University Cancer Center.

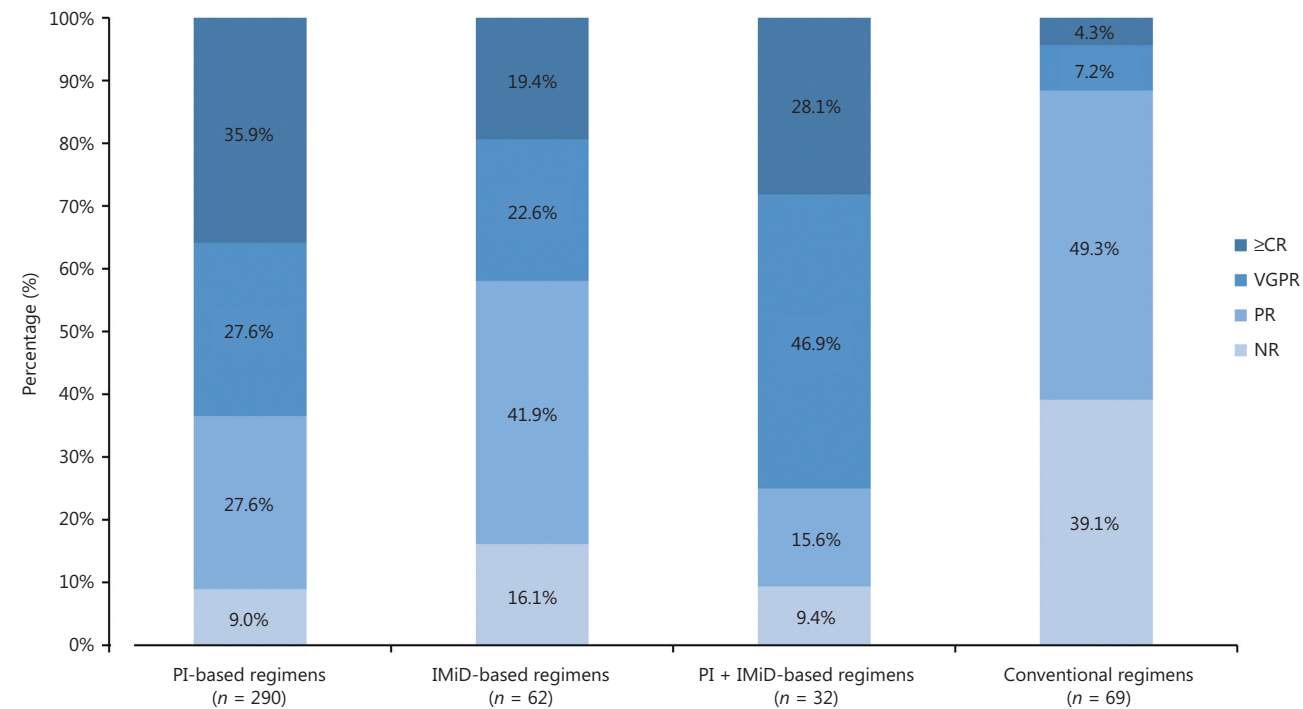

**Figure S4** Induction treatment response among patients with different treatment regimens. CR, complete response; IMiD, immunomodulatory drugs; NR, no response; PI, proteasome inhibitor; PR, partial response; and VGPR, very good partial response.

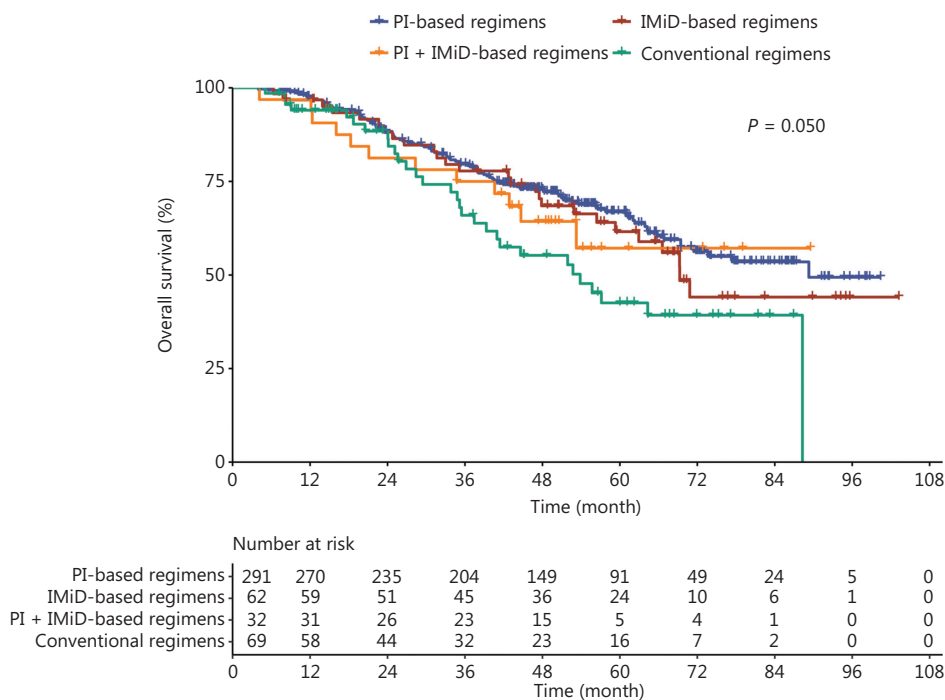

**Figure S5** Overall survival among patients with different treatment regimens. IMiD, immunomodulatory drug; PI, proteasome inhibitor.

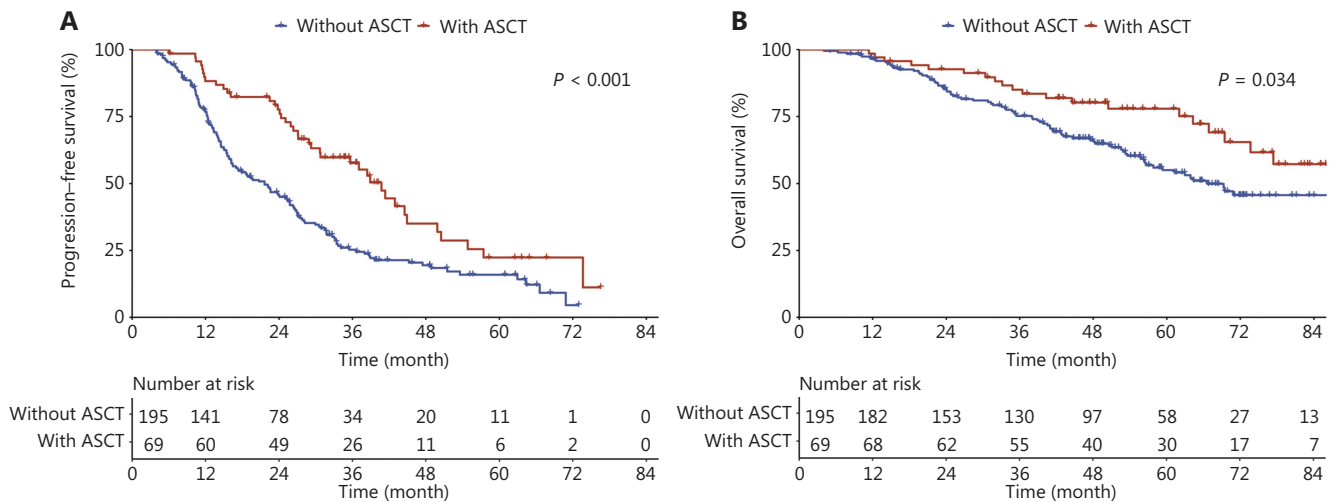

**Figure S6** Survival outcomes according to ASCT status among patients with R-ISS II/III disease, including (A) progression-free survival and (B) overall survival by ASCT status among patients with R-ISS II/III disease. ASCT, autologous stem cell transplantation; R-ISS, Revised-International Staging System.

**Table S1** Major induction regimens.

| PI-based regimens | IMiD-based regimens | PI+IMiD-based regimens | Conventional regimens |
|-------------------|---------------------|------------------------|-----------------------|
| VD                | RD                  | VRD                    | DECP                  |
| VC                | RCD                 | VTD                    | VCR+AD                |
| VAD               | TAD                 | VCDT                   | VCR+ACD               |
| VCD               | TCD                 | VADR                   |                       |
| VDE               | MPT                 | VMPT                   |                       |
| VDECP             | TADC                | VADCT                  |                       |

DECP, dexamethasone/etoposide/cyclophosphamide/cisplatin; IMiD, immunomodulatory drug; MPT, melphalan/prednisolone/thalidomide; PI, proteasome inhibitor; RCD, lenalidomide/cyclophosphamide/dexamethasone; RD, lenalidomide/dexamethasone; TAD, thalidomide/adriamycin/dexamethasone; TADC, thalidomide/adriamycin/dexamethasone/cyclophosphamide; TCD, thalidomide/cyclophosphamide/dexamethasone; VAD, bortezomib/adriamycin/dexamethasone; VADCT, bortezomib/adriamycin/dexamethasone/cyclophosphamide/thalidomide; VADR, bortezomib/adriamycin/dexamethasone/lenalidomide; VC, bortezomib/cyclophosphamide; VCD, bortezomib/cyclophosphamide/dexamethasone; VCDT, bortezomib/cyclophosphamide/dexamethasone/thalidomide; VD, bortezomib/dexamethasone; VDE, bortezomib/dexamethasone/etoposide; VDECP, bortezomib/dexamethasone/etoposide/cyclophosphamide/cisplatin; VCR+AD, vinblastine/adriamycin/dexamethasone; VCR+ACD, vinblastine/adriamycin/cyclophosphamide/dexamethasone; VMPT, bortezomib/melphalan/prednisolone/thalidomide; VRD, bortezomib/lenalidomide/dexamethasone; VTD, bortezomib/thalidomide/dexamethasone
